# Supplementary material for: Mechanism of SAPO-34 catalyst deactivation in the course of MTO conversion in a slurry reactor
Source: Royal Society of Chemistry journal article supplement (doi:10.1039/c7cy02045g), 2018-01-01
Supplement: c7cy02045g1.pdf [file c7cy02045g1.pdf]

Supporting information for  
Mechanism of SAPO-34 catalyst deactivation in the course of MTO  
conversion in slurry reactor

**Stanislav V. Konnov<sup>a</sup>, Vladimir S. Pavlov<sup>a</sup>, Pavel A. Kots<sup>b</sup>, Vladimir B. Zaytsev<sup>c</sup> and Irina I. Ivanova<sup>a,b\*</sup>**

<sup>a</sup> *A.V. Topchiev Institute of Petrochemical Synthesis, Lenensky avenue, bld. 29, 119991, Moscow, Russia.*

<sup>b</sup> *Department of Chemistry, Lomonosov Moscow State University, Leninskye Gory 1, bld. 3, 11999,1 Moscow, Russia.*

<sup>c</sup> *Department of Physics, Lomonosov Moscow State University, Leninskye Gory 1, bld. 2, 11999,1 Moscow, Russia.*

*\*Corresponding author: Tel.: +7(495)939-3570; Fax: +7(495)939-3570; E-mail address: iivanova@phys.chem.msu.ru.*

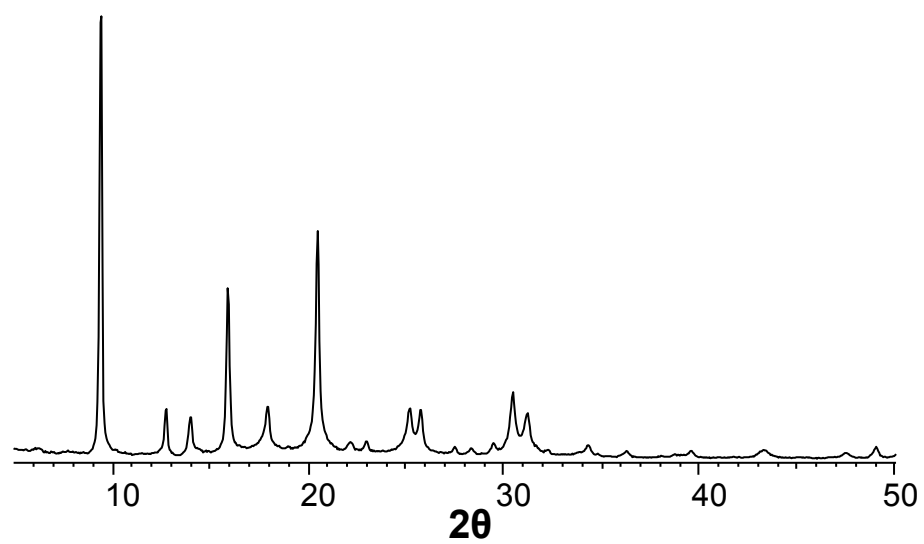

Fig. S1. XRD pattern of SAPO-34 catalyst.

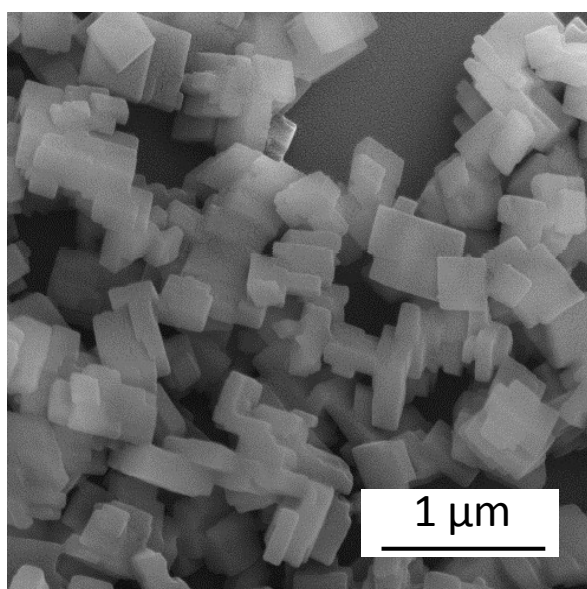

Fig. S2. SEM image of SAPO-34 catalyst.

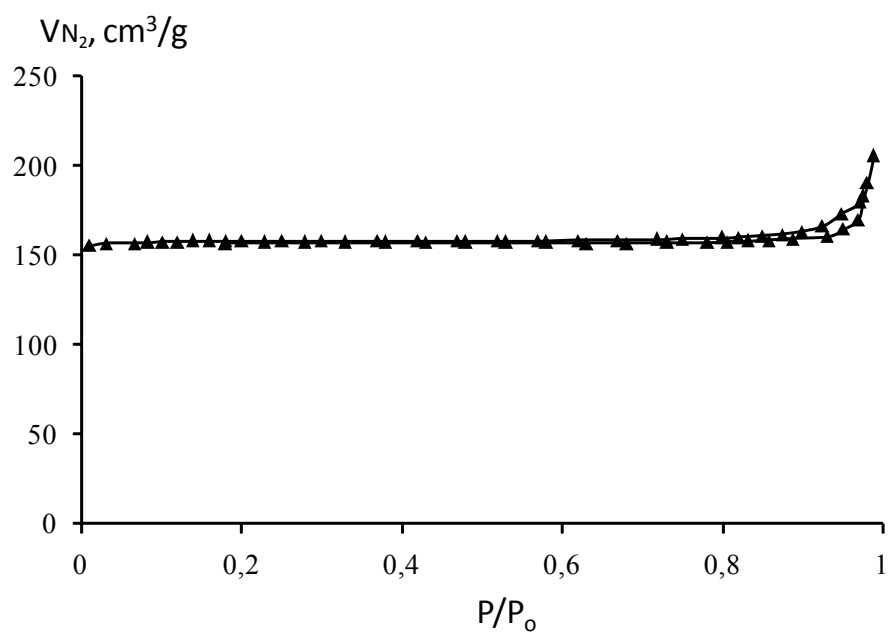

Fig. S3. Nitrogen adsorption/desorption isotherm of SAPO-34 catalyst.

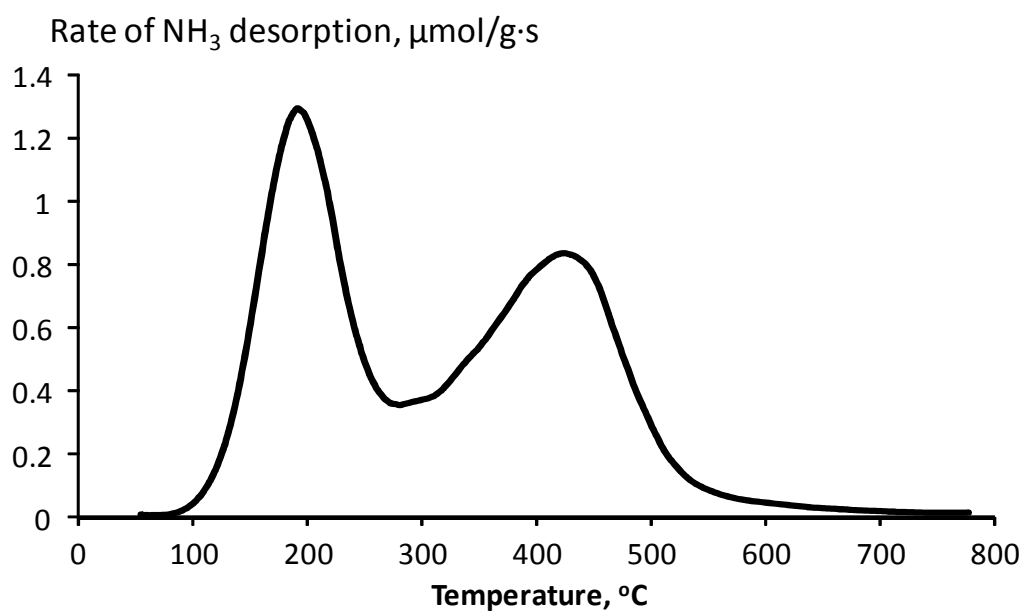

Fig. S4. TPD  $\text{NH}_3$  profile of SAPO-34 catalyst.

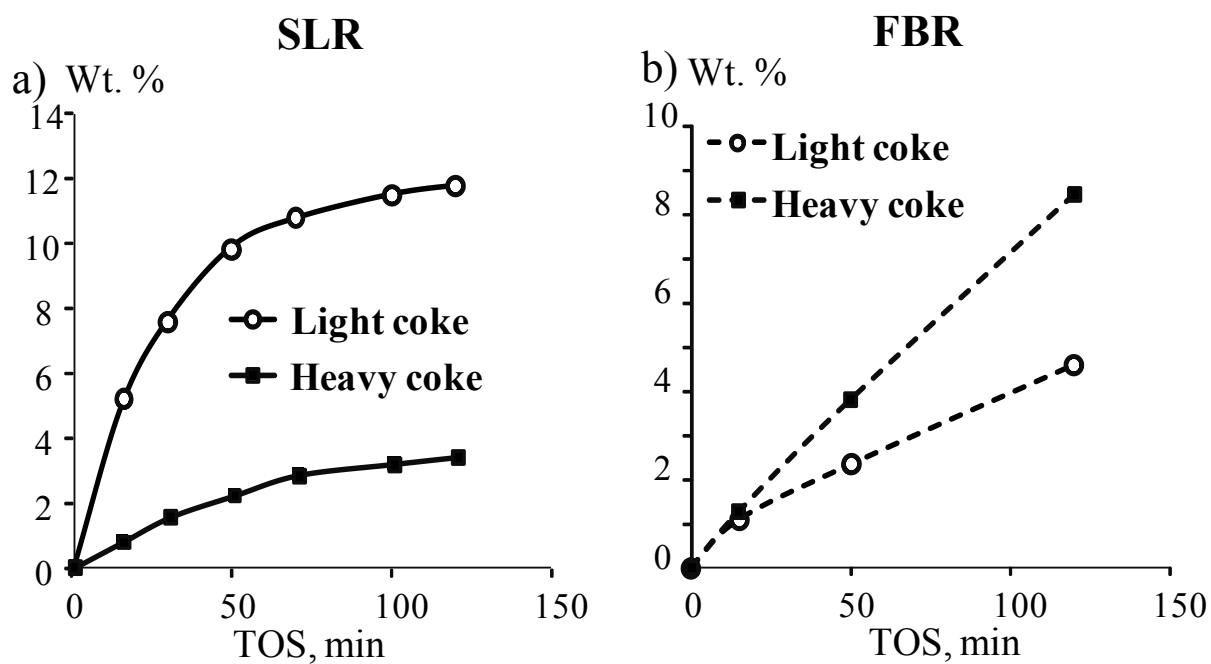

Fig. S5. Kinetics of “light” and “heavy” coke deposition under SLR (a) and FBR (b) conditions

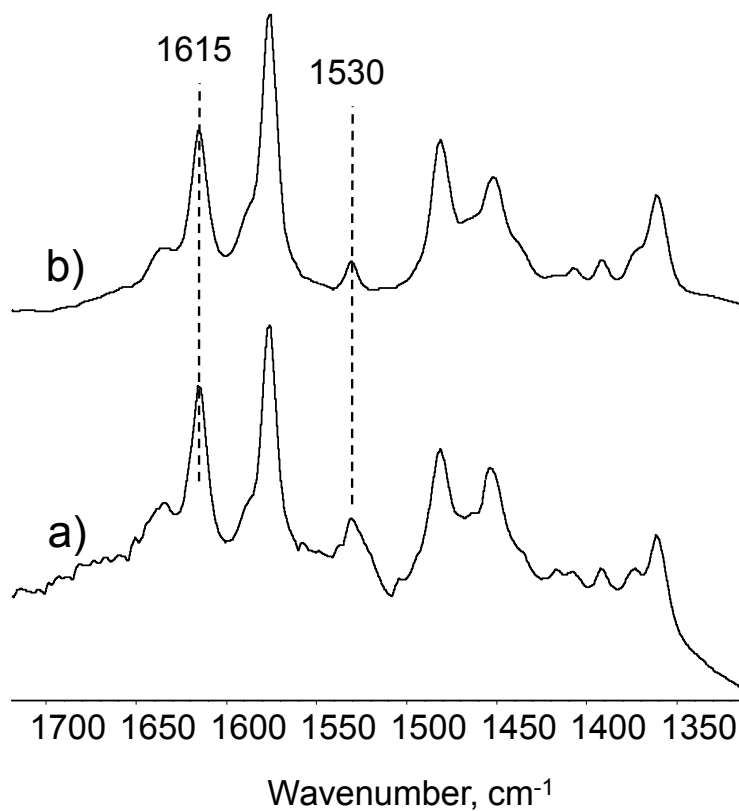

Fig. S6. FTIR spectra of DTBP adsorbed over fresh SAPO-34 sample (a), over  $\text{SiO}_2$  modified sample (b). Bands at  $1615$  and  $1530$   $\text{cm}^{-1}$  correspond to protonated DTBP.
